# Supplementary material
Source: PubMed Central journal article supplement (PMC5984165)
Supplement: NIHMS957310-supplement-9.pdf [file NIHMS957310-supplement-9.pdf]

**Table S2. *PVT1* translocations and fusion RNAs in human cancers, related to Figure 7.**

| <b>Cancer type</b> | <b>Fusion</b>                    | <b>Breakpoint</b>  | <b>Reference</b>        |
|--------------------|----------------------------------|--------------------|-------------------------|
| Burkitt's lymphoma | <i>PVT1-IGLL1</i>                | intron 1, 2 cases  | Shtivelman et al., 1989 |
|                    | <i>PVT1-IGKC</i>                 | intron 1, 2 cases  |                         |
| AML                | <i>PVT1-NSMCE2</i>               | intron 1           | Chinen et al., 2014     |
| Gastric cancer     | <i>PVT1-PDHX</i>                 | intron 1, 2 cases  | Kim et al., 2014        |
|                    | <i>PVT1-APIP</i>                 | intron 1           |                         |
|                    | <i>PVT1-ATE1</i>                 | intron 1           |                         |
|                    | <i>PVT1-PPAPDC1A</i>             | intron 1           |                         |
| Multiple myeloma   | <i>PVT1-NBEA</i>                 | intron 1           | Nagoshi et al., 2012    |
|                    | <i>PVT1-WWOX</i>                 | intron 1           |                         |
|                    | 4 other <i>PVT1</i> partner loci |                    |                         |
| Neuroblastoma      | <i>PVT1-MYC</i>                  | intron 1, 7 cases  | Northcott et al., 2012  |
|                    |                                  | intron 3, 4 cases  |                         |
|                    |                                  | intron 6           |                         |
|                    | <i>PVT1-NDRG</i>                 | intron 1           |                         |
| Small cell lung CA | <i>PVT1-CHD7</i>                 | intron 1, intron 3 | Pleasant et al., 2010   |
